# Supplementary material
Source: PubMed Central journal article supplement (PMC6330709)
Supplement: NIHMS1510452-supplement-Supplementary_Table_4.pdf [file NIHMS1510452-supplement-Supplementary_Table_4.pdf]

**Supplementary Table 4. Case Demographics**

| Subject | Case ID | Gender | Age (yr) | PMI (hr) | AD  | Braak stage | Section  | Source |
|---------|---------|--------|----------|----------|-----|-------------|----------|--------|
| 1       | 02-27   | Male   | 86       | 3.00     | No  | I           | FL       | BH     |
| 2       | 97-02   | Male   | 81       | 2.75     | No  | I           | FL       | BH     |
| 3       | 03-41   | Male   | 89       | 2.50     | No  | II          | FL, FFPE | BH     |
| 4       | 08-88   | Male   | 65       | 3.50     | No  | I           | FFPE     | BH     |
| 5       | 13-40   | Male   | 73       | 4.12     | No  | II          | FL, FFPE | BH     |
| 6       | 15-60   | Male   | 82       | 3.33     | No  | II          | FL, FFPE | BH     |
| 7       | 97-17   | Male   | 78       | 2.66     | No  | II          | FFPE     | BH     |
| 8       | T-4915  | Male   | 62       | 40.50    | No  | I           | FR       | NYBB   |
| 9       | T-4931  | Male   | 66       | 26.92    | No  | I           | FR       | NYBB   |
| 10      | T-5382  | Male   | 62       | 5.40     | No  | I           | FR       | NYBB   |
| 11      | T-5404  | Female | 54       | 16.60    | No  | I           | FR       | NYBB   |
| 12      | T-2467  | Male   | 89       | 6.15     | Yes | III-IV      | FR       | NYBB   |
| 13      | T-4448  | Female | 89       | 39.11    | Yes | III-IV      | FR       | NYBB   |
| 14      | T-4857  | Male   | 89       | 12.67    | Yes | III-IV      | FR       | NYBB   |
| 15      | 03-52   | Male   | 86       | 2.16     | Yes | III-IV      | FL, FFPE | BH     |
| 16      | 05-39   | Male   | 82       | 3.00     | Yes | III-IV      | FL, FFPE | BH     |
| 17      | 10-67   | Male   | 78       | 3.33     | Yes | III-IV      | FL, FFPE | BH     |
| 18      | 99-21   | Male   | 86       | 3.33     | Yes | III-IV      | FL, FFPE | BH     |
| 19      | 99-28   | Male   | 80       | 3.00     | Yes | III-IV      | FL, FFPE | BH     |
| 20      | 04-24   | Male   | 78       | 1.83     | Yes | V-VI        | FL, FFPE | BH     |
| 21      | 04-66   | Male   | 87       | 5.33     | Yes | V-VI        | FFPE     | BH     |
| 22      | 05-37   | Male   | 71       | 2.75     | Yes | V-VI        | FFPE     | BH     |
| 23      | 08-20   | Male   | 76       | 3.33     | Yes | V-VI        | FFPE     | BH     |
| 24      | 08-45   | Male   | 78       | 2.25     | Yes | V-VI        | FL, FFPE | BH     |
| 25      | 13-10   | Male   | 74       | 2.58     | Yes | V-VI        | FL       | BH     |
| 26      | 13-66   | Male   | 75       | 3.83     | Yes | V-VI        | FL       | BH     |
| 27      | 14-06   | Male   | 85       | 3.50     | Yes | V-VI        | FL       | BH     |
| 28      | T-4341  | Male   | 83       | 15.9     | Yes | V-VI        | FR       | NYBB   |
| 29      | T-5296  | Male   | 62       | 8.25     | Yes | V-VI        | FR       | NYBB   |
| 30      | T-5365  | Male   | 88       | 6.00     | Yes | V-VI        | FR       | NYBB   |
| 31      | T-5367  | Male   | 73       | 23.00    | Yes | V-VI        | FR       | NYBB   |
| 32      | T-5398  | Female | 89       | 19.25    | Yes | V-VI        | FR       | NYBB   |

PMI, postmortem interval; AD, Alzheimer's disease; FL, floating section; FR, frozen section; FFPE, formalin-fixed paraffin-embedded section; BH, Banner Sun Health Research Institute; NYBB, New York Brain Bank.
